# Supplementary material
Source: publisher figshare collection journal article supplement (https://aacr.figshare.com/articles/dataset/_/22402412)

A

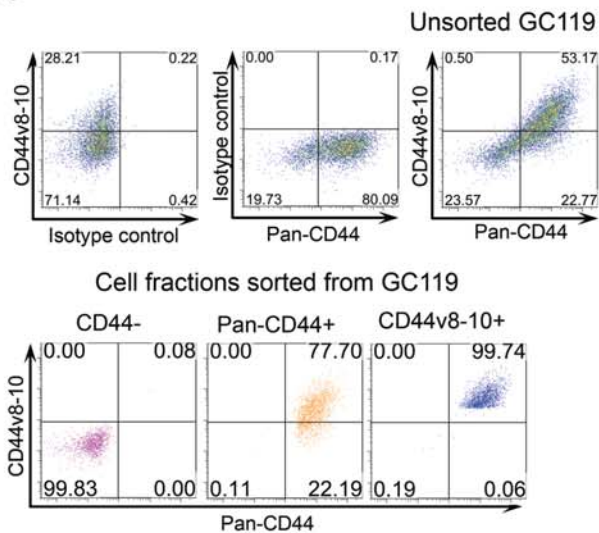

B

| Cells injected | Proportion of mice with tumors |
|----------------|--------------------------------|
| Pan-CD44+      | 2/8                            |
| CD44-          | 0/8                            |
| CD44v8-10+     | 6/8                            |

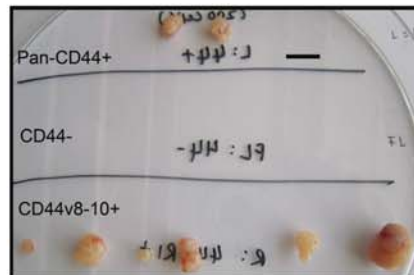

C

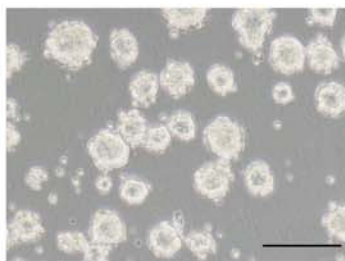

D

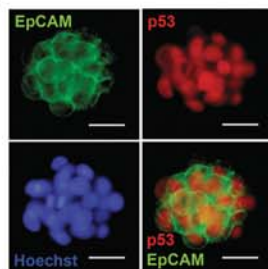

E

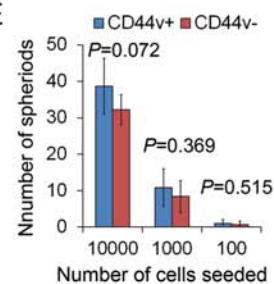

F

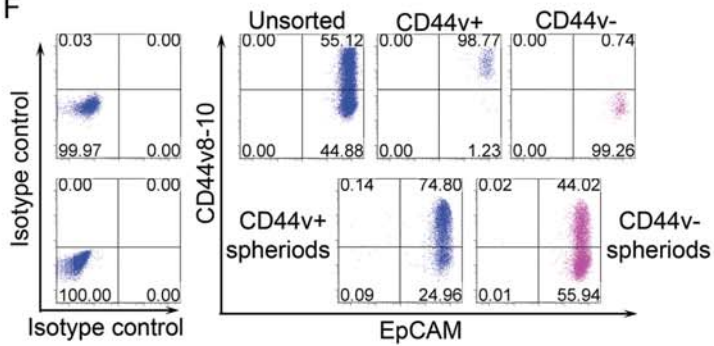

Supplement: Supplementary file 1 [file 39848207]
